# Supplementary material for: Calcium fluoride based multifunctional nanoparticles for multimodal imaging
Source: publisher site journal article supplement (doi:10.3762/bjnano.8.148), 2017-07-18
Supplement: Additional file 1 [file 2190-4286-8-148-S1.pdf]

# Supporting Information

for

## Calcium fluoride based multifunctional nanoparticles for multimodal imaging

Marion Straßer<sup>\*,‡,1,2</sup>, Joachim H. X. Schrauth<sup>‡,3,4</sup>, Sofia Dembski<sup>1,5,6</sup>, Daniel Haddad<sup>3,7</sup>, Bernd Ahrens<sup>8,9</sup>, Stefan Schweizer<sup>8,9</sup>, Bastian Christ<sup>5</sup>, Alevtina Cubukova<sup>5</sup>, Marco Metzger<sup>5,6</sup>, Heike Walles<sup>5,6</sup>, Peter M. Jakob<sup>3,4</sup> and Gerhard Sextl<sup>1,2</sup>

Address: <sup>1</sup>Fraunhofer Institute for Silicate Research ISC, Neunerplatz 2, 97082 Wuerzburg, Germany; <sup>2</sup>Department of Chemical Technology of Materials Synthesis, University of Wuerzburg, Roentgenring 11, 97070 Wuerzburg, Germany; <sup>3</sup>MRB Research Center for Magnetic Resonance Bavaria, Am Hubland, 97074 Wuerzburg, Germany; <sup>4</sup>Department of Experimental Physics 5 (Biophysics), University of Wuerzburg, Am Hubland, 97074 Wuerzburg, Germany; <sup>5</sup>Translational Center Wuerzburg "Regenerative Therapies for Oncology and Musculoskeletal Diseases", Branch of Fraunhofer Institute for Interfacial Engineering and Biotechnology IGB, 97070 Wuerzburg, Germany; <sup>6</sup>University Hospital Wuerzburg, Chair Tissue Engineering and Regenerative Medicine, Roentgenring 11, 97070 Wuerzburg, Germany; <sup>7</sup>Magnetic Resonance and X-ray Imaging Department of Fraunhofer Development Center X-ray Technology EZRT, a division of Fraunhofer Institute for Integrated Circuits IIS, Am Hubland, 97074 Wuerzburg, Germany; <sup>8</sup>South Westphalia University of Applied Sciences, Luebecker Ring 2, 59494 Soest, Germany and <sup>9</sup>Fraunhofer Application Center for Inorganic Phosphors, Branch Lab of Fraunhofer Institute for Microstructure of Materials and Systems IMWS, Luebecker Ring 2, 59494 Soest, Germany

Email: Marion Straßer\* - marion.strasser@isc.fraunhofer.de

\* Corresponding author

‡ Equal contributors

## Additional figures and data

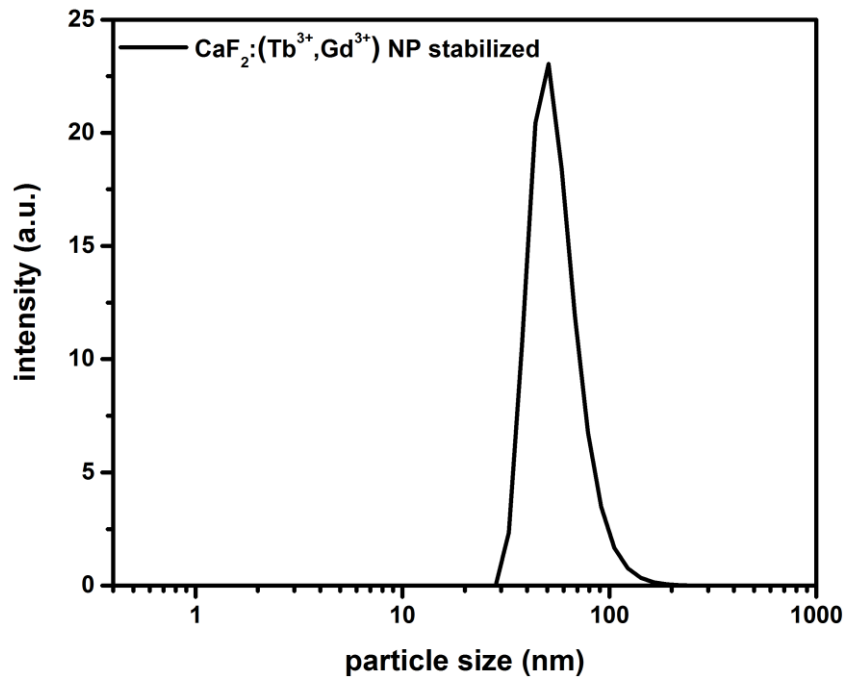

**Figure S1:** DLS measurement of the CaF<sub>2</sub>:(Tb<sup>3+</sup>,Gd<sup>3+</sup>) NPs stabilized with Melpers<sup>®</sup>2450 (number-weighted).

$$r_1 = \frac{4.59 \cdot 10^3 \cdot \text{mL} \cdot \text{mol}}{10^{-3} \cdot \text{mol} \cdot \text{s} \cdot 938 \cdot 10^3 \cdot \text{mg}}$$

Relaxivity Magnevist: 4.59 L·mmol<sup>-1</sup>·s<sup>-1</sup> from literature [38]

Molar Mass Magnevist: 938 g·mol<sup>-1</sup>

**Figure S2:** Calculating method for converting the unit of the relaxivity.

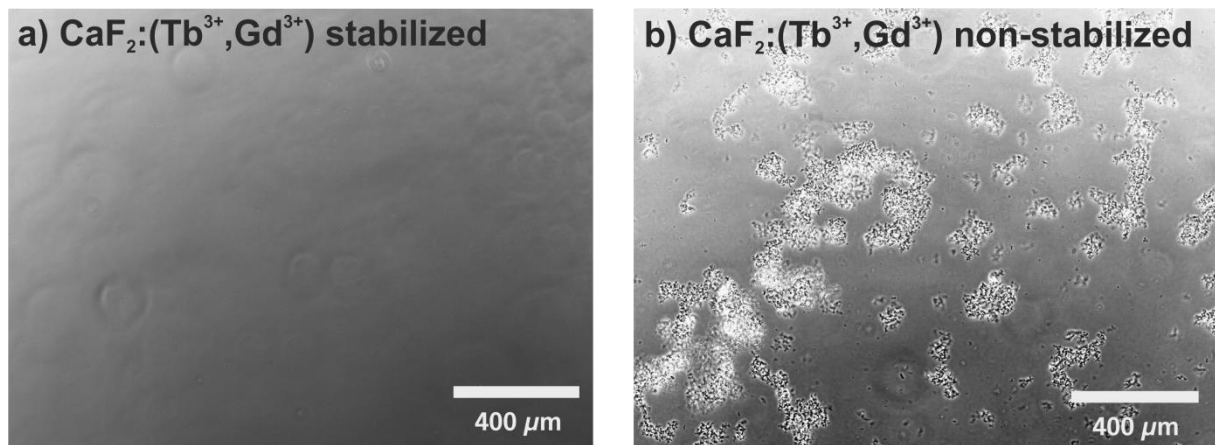

**Figure S3:** Microscopic images of the  $\text{CaF}_2:(\text{Tb}^{3+}, \text{Gd}^{3+})$  NPs ( $c = 5 \text{ mg}\cdot\text{mL}^{-1}$ ):  
a) stabilized with Melpers<sup>®</sup> 2450 and b) non-stabilized.

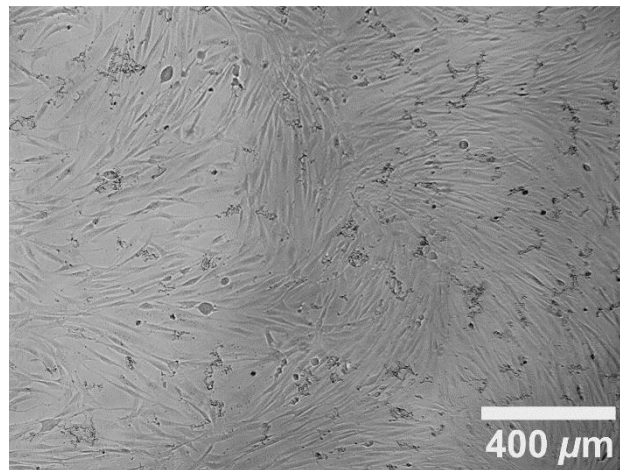

**Figure S4:** Representative microscopic image of the untreated hdF in DMEM with 10% FCS.
